# Supplementary material for: Coupled immune stratification and identification of therapeutic candidates in patients with lung adenocarcinoma
Source: publisher site journal article supplement (doi:10.18632/aging.103775), 2020-08-27
Supplement: Supplementary file [file aging-v12i16-103775-supplementary-material-SD1.pdf]

**SUPPLEMENTARY FIGURES**

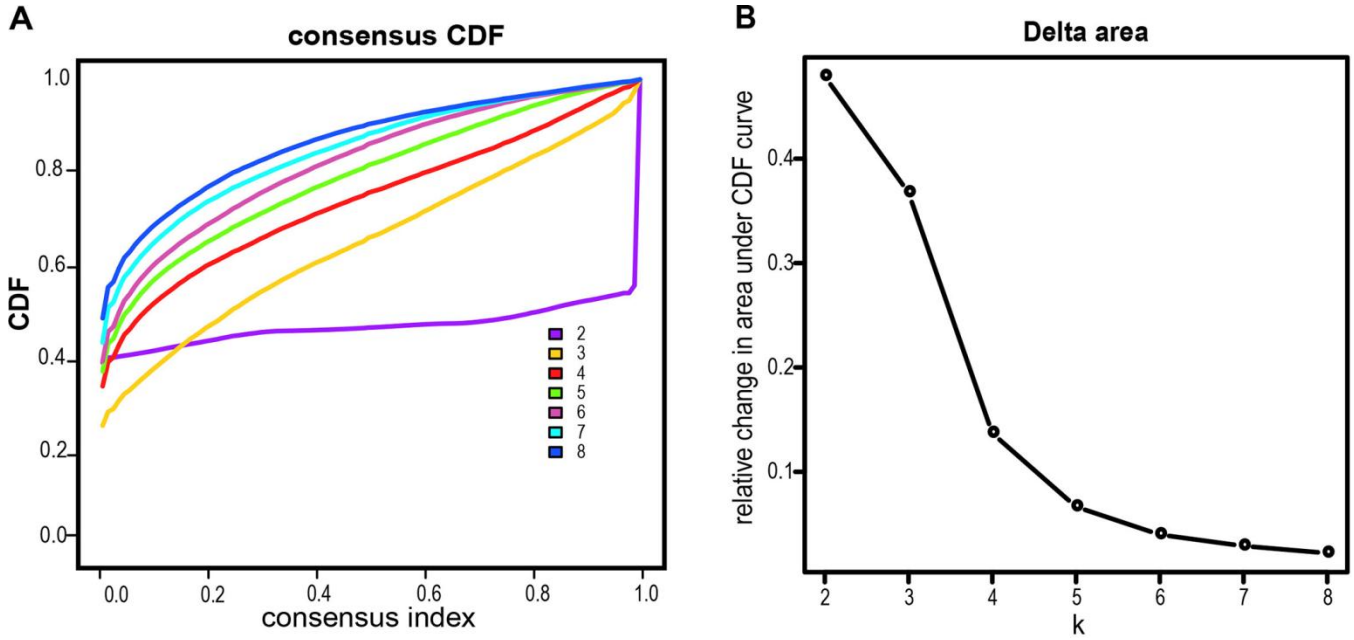

**Supplementary Figure 1. The cumulative distribution function (CDF) curves. (A)** The CDF curves in unsupervised consensus cluster analysis. The cluster numbers ( $k = 2, 3, 4, 5, 6, 7, 8$ ) and their corresponding consensus scores. **(B)** Relative changes of the area under CDF curves. The number of clusters are shown on the x-axis. The y-axis indicates the proportion of areas under CDF curve.

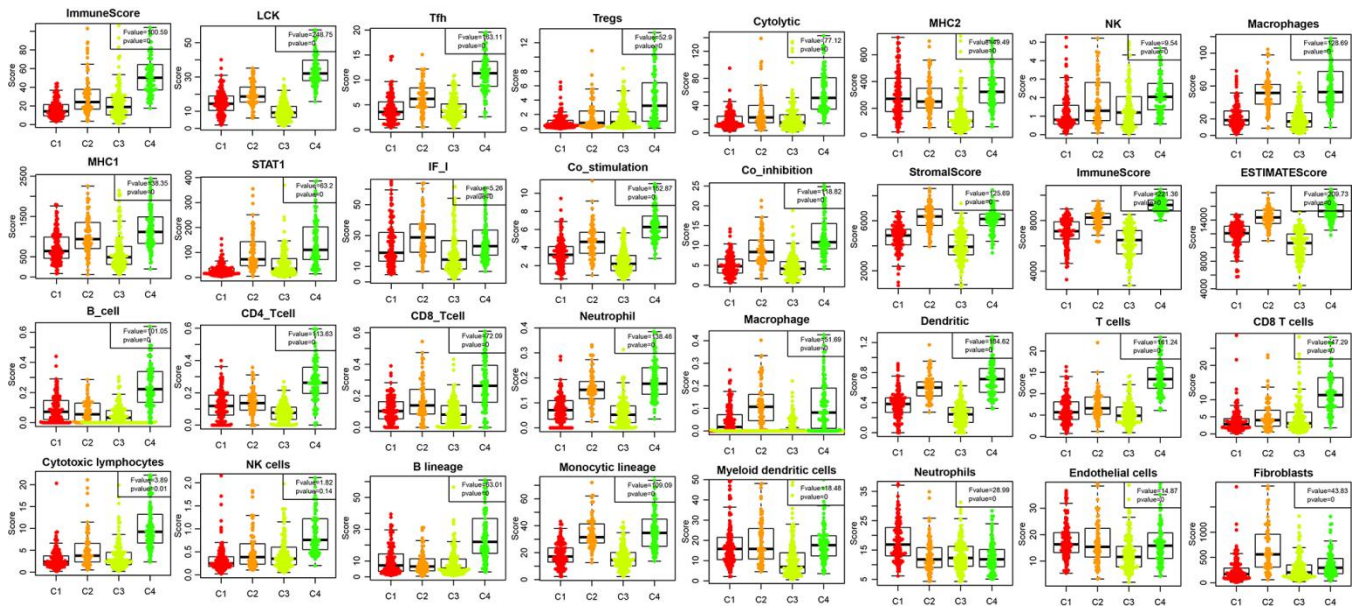

**Supplementary Figure 2. Boxplots showing the gene expression scores of immune profiles of the four subtypes. Boxplots show 5%, 25%, 50%, 75%, and 95%, respectively.**

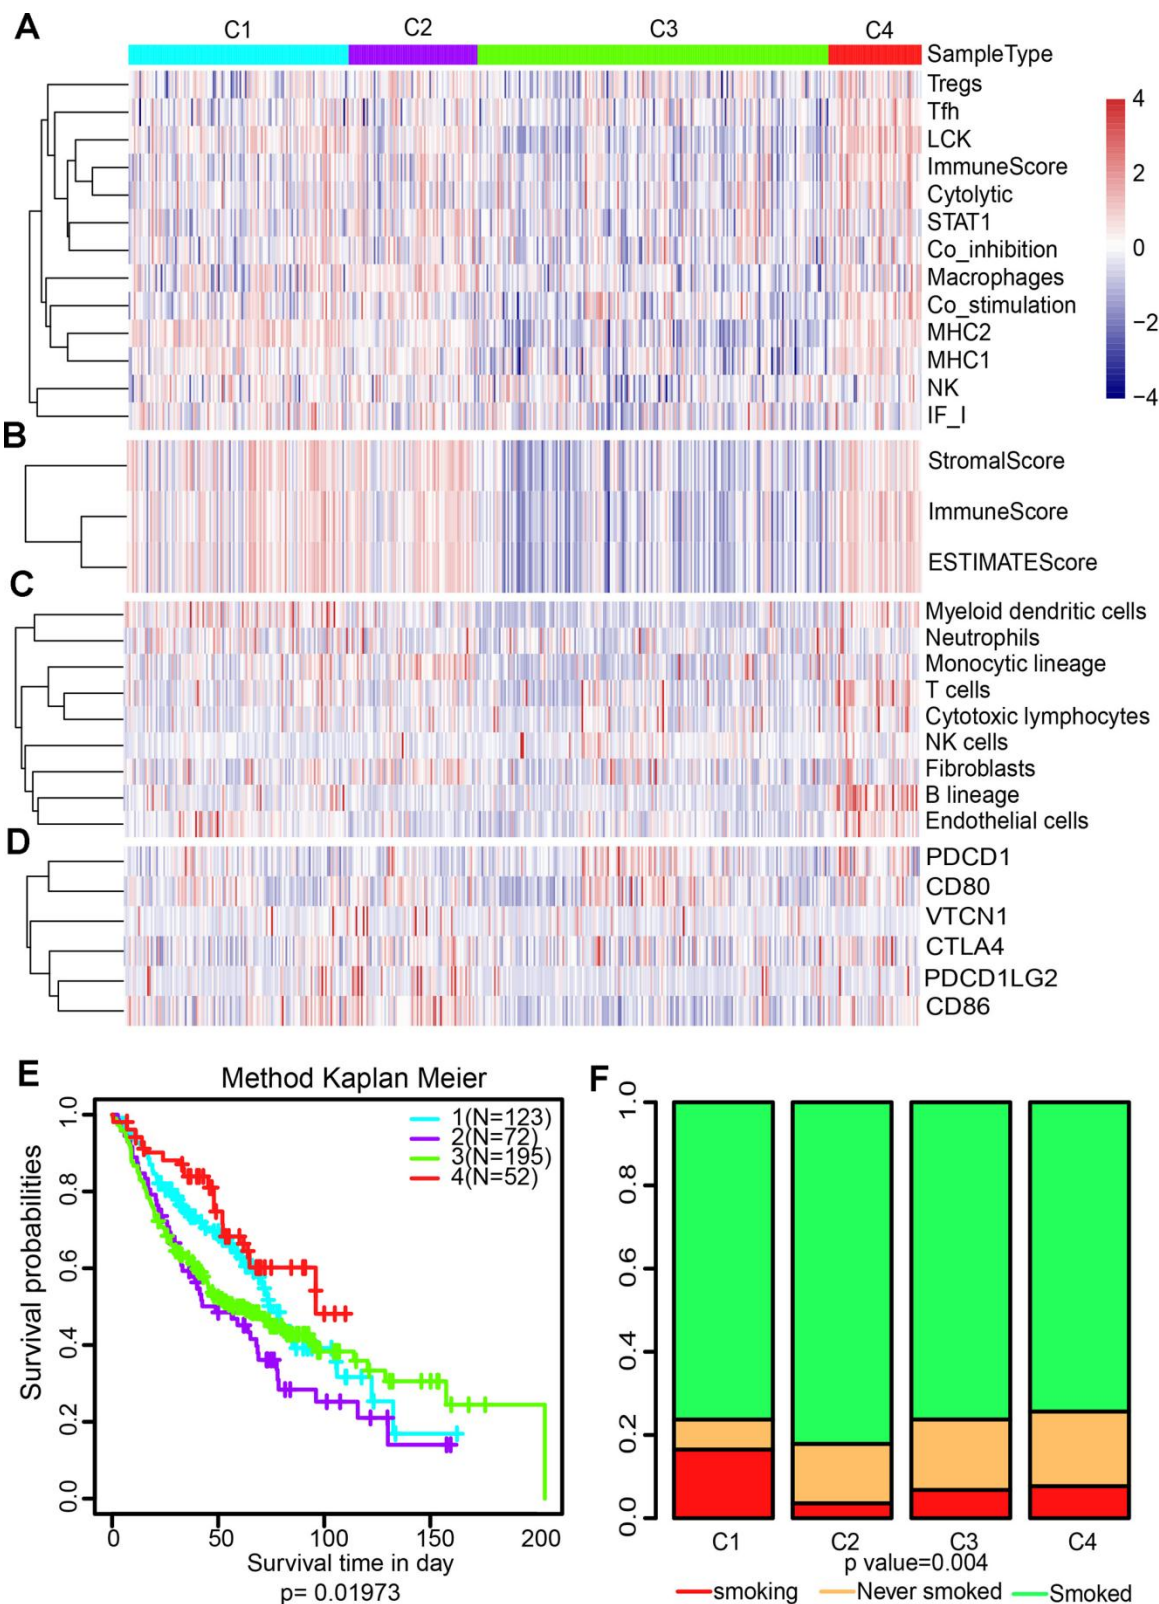

**Supplementary Figure 3. Validation of the four immune-associated subtypes in the GEO LUAD cohort.** (A) The expression levels of 13 immune metagenes. (B) The expression levels of genes included in the ESTIMATE algorithm for determination of stromal and immune gene signatures. (C) The expression scores of genes related to 10 groups of immune cells. (D) The expression scores of checkpoint molecules among the four subtypes in the GEO LUAD cohort. (E) Kaplan–Meier curves showing the overall survival (OS) of the four subtypes (log-rank test). (F) Distribution of smoking status among the four subtypes.

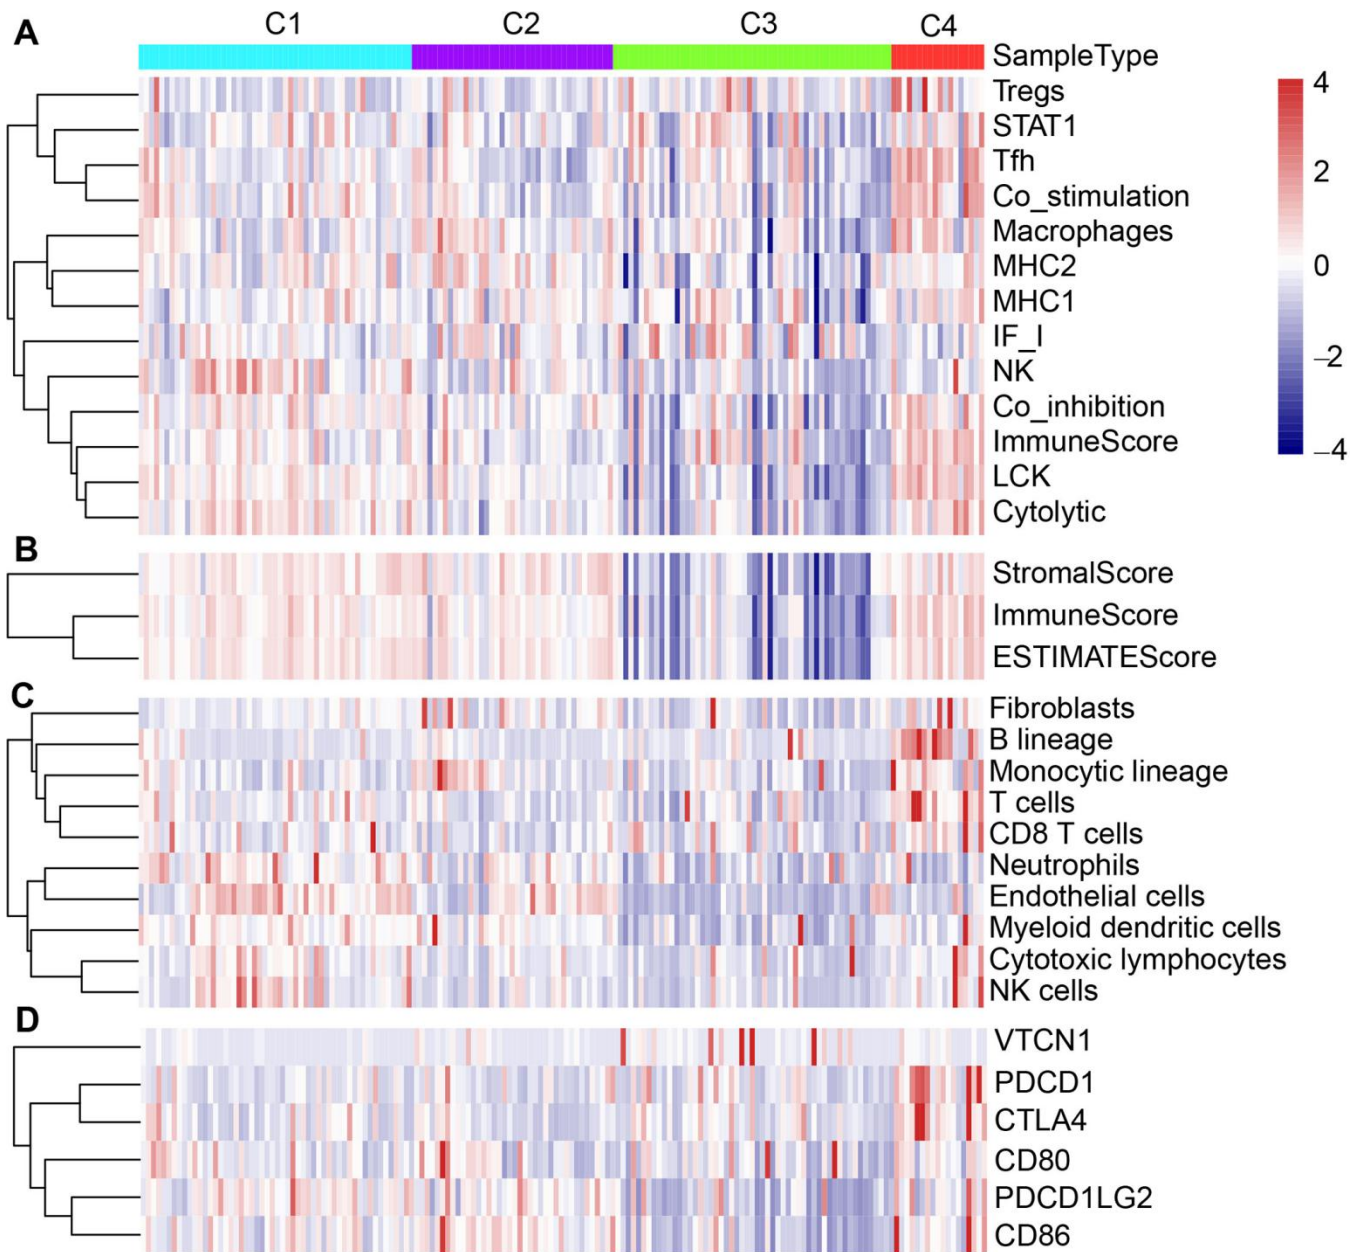

**Supplementary Figure 4. Validation of the four immune-associated subtypes in the GSE40419 dataset.** (A) The expression levels of 13 immune metagenes. (B) The expression levels of genes included in the ESTIMATE algorithm for determination of stromal and immune gene signatures. (C) The expression scores of genes related to 10 groups of immune cells. (D) The expression scores of checkpoint molecules among the four subtypes.



**A**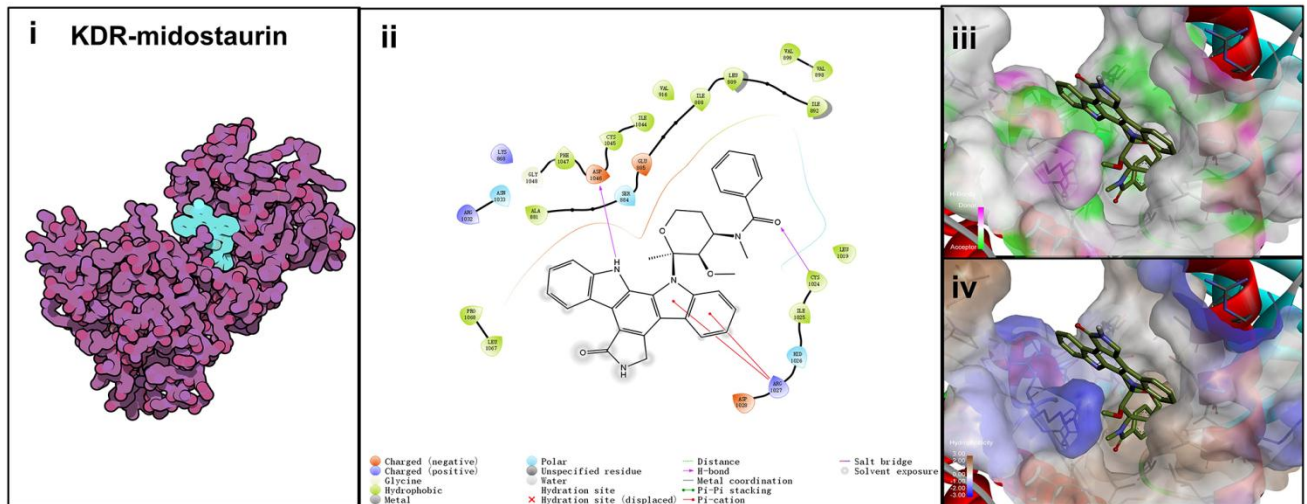**B**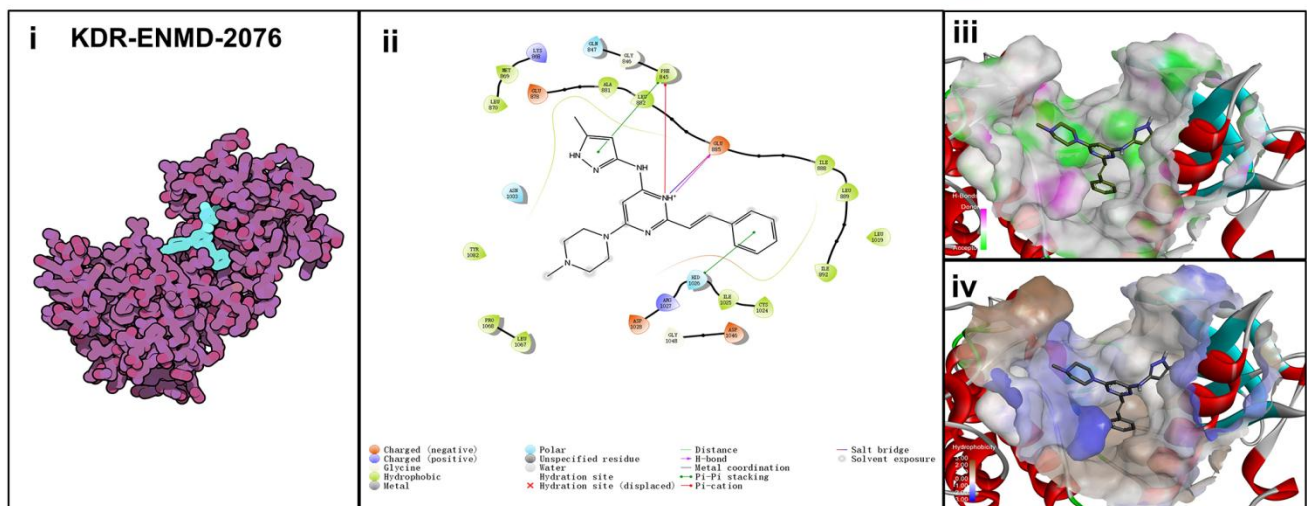

**Supplementary Figure 5. Binding mode of screened drugs to KDR protein by molecular docking.** (A) Binding mode of midostaurin to KDR. (B) Binding mode of ENMD-2076 to KDR. (i), Cartoon representation, overlay of the crystal structures of small molecule compounds and their targets were illustrated by Molecule of the Month feature. (ii), 2D interactions of compounds and their targets. (iii, iv) Three-dimensional structures of the binding pockets were showed by PyMOL software. (iii), Coloring is from carmine (for strong H-bonds) to green (for poor H-bonds). (iv), Coloring is from magenta (for strong hydrophobic regions) to blue (for poor hydrophobic regions).
